# Supplementary material for: Trends in socioeconomic inequalities in stunting prevalence in Latin America and the Caribbean countries: differences between quintiles and deciles
Source: Springer Nature journal article supplement (doi:10.1186/s12939-019-1046-7), 2019-10-15
Supplement: MOESM1 [file 17275036]

Additional file 1. Annual change in absolute and relative inequalities for stunting in LAC countries

| Country            | Concentration Index annual change | IC 95%      | Slope Index of Inequality annual change | IC 95%      |
|--------------------|-----------------------------------|-------------|-----------------------------------------|-------------|
| Belize             | -1.71                             | -3.31;-0.11 | -0.24                                   | -1.43;0.94  |
| Bolivia            | 0.24                              | -0.36;0.84  | 0.61                                    | 0.26;0.96   |
| Colombia           | -0.79                             | -1.12;-0.46 | -0.19                                   | -0.51;0.13  |
| Dominican Republic | -0.99                             | -1.34;-0.65 | -0.81                                   | -1.35;-0.27 |
| Guatemala          | 0.13                              | -0.20;0.47  | 0.22                                    | 0.09;0.35   |
| Haiti              | 0.01                              | -0.30;0.32  | 0.37                                    | 0.18;0.55   |
| Honduras           | -1.61                             | -2.38;-0.84 | 0.26                                    | -0.25;0.78  |
| Peru               | -1.02                             | -1.19;-0.86 | 0.66                                    | 0.55;0.77   |
| Suriname           | -1.32                             | -3.50;0.85  | -1.2                                    | -4.55;2.15  |
